# Supplementary material for: You Don’t See What I See: Individual Differences in the Perception of Meaning from Visual Stimuli
Source: PLoS One. 2016 Mar 8;11(3):e0150615. doi: 10.1371/journal.pone.0150615 (PMC4783041; doi:10.1371/journal.pone.0150615)
Supplement: S1 Dataset — (XLSX) [file pone.0150615.s002.xlsx]

## Sheet: Sheet1
	Figures for Experiment 1 , for PLOS manuscript - created 31/8/15. Edited 29/1/16
			Results on the POM and RDT for the high and low UnuExp groups (N = 102)
									95% confidence intervals
									Low UnuExp		High UnuExp
				Low Unusual Experiences score	High Unusual Experiences score				Lower	Upper	Lower	Upper
			RDT complex responses	8.3667	14.2628				3.0749	3.0748	4.3317	4.3318
			RDT simple responses	2.2333	4.7436				0.974	0.9741	2.1122	2.1121
			POM complex false alarms	6.1889	11.7842				1.6165	1.6164	2.7112	2.7112
			POM simple false alarms	2.3889	3.5577				0.55	0.5499	0.8328	0.8328
		Figure 2
			Results on the POM for UnuExp across the different frequency brackets in Experiment 1
									95% confidence intervals
									Low UnuExp		High UnuExp
				Low Unusual Experiences score	High Unusual Experiences score				Lower	Upper	Lower	Upper
			0.5 c/deg	12.2	24.2308				3.4799	3.4799	5.8001	5.8001
			1 c/deg	9.5333	20.4487				3.0979	3.098	4.7463	4.7463
			2 c/deg	5.8	10.1282				1.9311	1.9311	2.8229	2.8229
			4 c/deg	3.7333	5.7051				1.4276	1.4276	1.9736	1.9737
			8 c/deg	2.2	3.9103				0.8897	0.8897	1.5235	1.5234
			16 c/deg	3.6667	6.2821				1.3156	1.3155	2.3148	2.3147
		Figure 3
																Figure 7
	Figures for Experiment 2 , for PLOS manuscript - created 31/8/15. Edited 29/1/16
			Results on the POM for performance across the different spatial frequency brackets in Experiment 2 (N = 94)
									95% confidence intervals
				Hit rates					Low UnuExp		High UnuExp
				Low Unusual Experiences score	High Unusual Experiences score				Lower	Upper	Lower	Upper
			1 c/deg	0.908683	0.936562				0.0238229	0.0238228	0.0127832	0.0131716
			2 c/deg	0.836017	0.849567				0.0238826	0.0238827	0.0288168	0.0255963
			4 c/deg	0.516136	0.532339				0.0421935	0.0421935	0.0508472	0.0508472
			8 c/deg	0.188815	0.224388				0.0364601	0.0364601	0.0499963	0.0499778
									95% confidence intervals
				False alarm rates					Low UnuExp		High UnuExp
				Low Unusual Experiences score	High Unusual Experiences score				Lower	Upper	Lower	Upper
			1 c/deg	0.321807	0.458835				0.0608399	0.0655873	0.0714578	0.0714628
			2 c/deg	0.269097	0.380851				0.0592566	0.0592566	0.0678374	0.0678374
			4 c/deg	0.114971	0.17101				0.0305032	0.0305032	0.0451917	0.0451916
			8 c/deg	0.0516617	0.0994116				0.0172892	0.0172891	0.0373977	0.0373977
									95% confidence intervals
				d prime					Low UnuExp		High UnuExp
				Low Unusual Experiences score	High Unusual Experiences score				Lower	Upper	Lower	Upper
			1 c/deg	2.02366	1.82085				0.161092	0.161093	0.175862	0.175862
			2 c/deg	1.81434	1.55441				0.173158	0.173158	0.14221	0.142211
			4 c/deg	1.44917	1.29471				0.131451	0.131451	0.128879	0.128878
			8 c/deg	0.856221	0.698729				0.118605	0.118605	0.0985858	0.0985858
									95% confidence intervals
				beta					Low UnuExp		High UnuExp
				Low Unusual Experiences score	High Unusual Experiences score				Lower	Upper	Lower	Upper
			1 c/deg	0.717131	0.410467				0.273522	0.273522	0.0868423	0.0868423
			2 c/deg	1.71076	1.012				0.870143	0.870143	0.328833	0.328832
			4 c/deg	4.32301	4.02535				1.23238	1.23238	1.49217	1.49217
			8 c/deg	4.42343	2.81677				1.01811	1.01811	0.572768	0.572768
									95% confidence intervals
				1-1/beta+1					Low UnuExp		High UnuExp
			1 c/deg	0.417633	0.291015				0.214776	0.214776	0.0799033	0.0799033
			2 c/deg	0.6311	0.502982				0.465281	0.465282	0.24746	0.247459
			4 c/deg	0.812136	0.801009				0.552047	0.552047	0.598744	0.598744
			8 c/deg	0.815615	0.737998				0.504486	0.504486	0.364178	0.364178
				Reaction times (ms)
					Low Unusual Experiences Score		High Unusual Experiences Score
			N		46		48
					Low Unusual Experiences Score		High Unusual Experiences Score
			Difference score (False alarm – Hits)	Difference	132	28.3089	135	19.9186
			RT for False alarms	FA	921	39.9568	902	31.4656
			RT for Hits	Hits	790	18.1354	766	22.8053
					Low Unusual Experiences Score		High Unusual Experiences Score
			RT for SPB centred at 1 c/deg	1cpd	852	22.4112	822	24.393
			RT for SPB centred at 2 c/deg	2cpd	894	22.5586	864	25.6921
			RT for SPB centred at 4 c/deg	4cpd	928	30.373	903	28.7232
			RT for SPB centred at 8 c/deg	8cpd	913	34.6489	887	31.4656
														Figure 6
									95% confidence intervals
				Hit and false alarm rates					Low UnuExp		High UnuExp
				Low Unusual Experiences score	High Unusual Experiences score				Lower	Upper	Lower	Upper
			Hit rates	0.614714	0.637227				0.0264253	0.0264252	0.0290488	0.0290487
			False alarm rates	0.186041	0.274502				0.039074	0.039074	0.0459874	0.0459874
									95% confidence intervals
				Sensitivity					Low UnuExp		High UnuExp
				Low Unusual Experiences score	High Unusual Experiences score				Lower	Upper	Lower	Upper
			Sensitivity	1.32763	1.05978				0.131256	0.131256	0.118981	0.118982
									95% confidence intervals
				Response criterion					Low UnuExp		High UnuExp
				Low Unusual Experiences score	High Unusual Experiences score				Lower	Upper	Lower	Upper
			Response criterion	2.38111	1.61301				0.637823	0.637822	0.368486	0.368486
									95% confidence intervals
				1-1/beta+1					Low UnuExp		High UnuExp
			Response criterion	0.70424	0.6173				0.389433	0.389433	0.269265	0.269265
												95% confidence intervals
			Expectation									Low UnuExp		High UnuExp		Figure 5
								sd		se		Low 95%		High 95%
			Hit Rate	Low Unusual Experiences score	High Unusual Experiences score			Low Unusual Experiences score	High Unusual Experiences score			Upper	Lower	Upper	Lower
			0.25	0.61	0.58			0.081	0.095	0.0115714	0.0135714	0.02268	0.02268	0.0266	0.0266
			0.5	0.57	0.63			0.086	0.096	0.0122857	0.0137143	0.02408	0.02408	0.02688	0.02688
			0.75	0.66	0.7			0.085	0.081	0.0121429	0.0115714	0.0238	0.0238	0.02268	0.02268
			False Alarm	Low Unusual Experiences score	High Unusual Experiences score			Low Unusual Experiences score	High Unusual Experiences score
			0.25	0.14	0.16			0.124	0.119	0.0177143	0.017	0.03472	0.03472	0.03332	0.03332
			0.5	0.15	0.25			0.096	0.121	0.0137143	0.0172857	0.02688	0.02688	0.03388	0.03388
			0.75	0.27	0.42			0.135	0.121	0.0192857	0.0172857	0.0378	0.0378	0.03388	0.03388
			Sensitivity	Low Unusual Experiences score	High Unusual Experiences score			Low Unusual Experiences score	High Unusual Experiences score
			0.25	1.5	1.35			0.43	0.39	0.0614286	0.0557143	0.1204	0.1204	0.1092	0.1092
			0.5	1.37	1.07			0.48	0.37	0.0685714	0.0528571	0.1344	0.1344	0.1036	0.1036
			0.75	1.12	0.74			0.39	0.24	0.0557143	0.0342857	0.1092	0.1092	0.0672	0.0672
		1 - (1/(beta+1))	Response Bias	Low Unusual Experiences score	High Unusual Experiences score			Low Unusual Experiences score	High Unusual Experiences score
			0.25	0.68	0.66			0.12	0.13	0.0171429	0.0185714	0.2352	0.2352	0.2548	0.2548
			0.5	0.67	0.56			0.13	0.087	0.0185714	0.0124286	0.2548	0.2548	0.17052	0.17052
			0.75	0.55	0.47			0.12	0.042	0.0171429	0.006	0.2352	0.2352	0.08232	0.08232
		Beta
				2.125	1.94118			0.136364	0.149425	0.0194805	0.0213465	0.267273	0.267273	0.292874	0.292874
				2.0303	1.27273			0.149425	0.0952903	0.0213465	0.0136129	0.292874	0.292874	0.186769	0.186769
				1.22222	0.886792			0.136364	0.0438413	0.0194805	0.00626305	0.267273	0.267273	0.085929	0.085929
